# Supplementary material
Source: PubMed Central journal article supplement (PMC3463259)
Supplement: cr201292x1.pdf [file cr201292x1.pdf]

Supplementary information, Figure S1

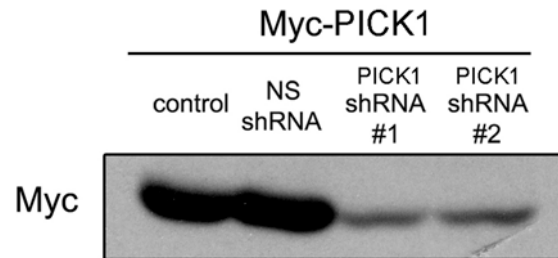

**Figure S1** Knockdown efficiency of PICK1 shRNAs. HEK293T cells were co-transfected with Myc-PICK1 and shRNAs and harvested for anti-Myc immunoblotting. Nonspecific shRNA was used as a negative control.
