# Supplementary material
Source: PubMed Central journal article supplement (PMC3463259)
Supplement: cr201292x2.pdf [file cr201292x2.pdf]

Supplementary information, Figure S2

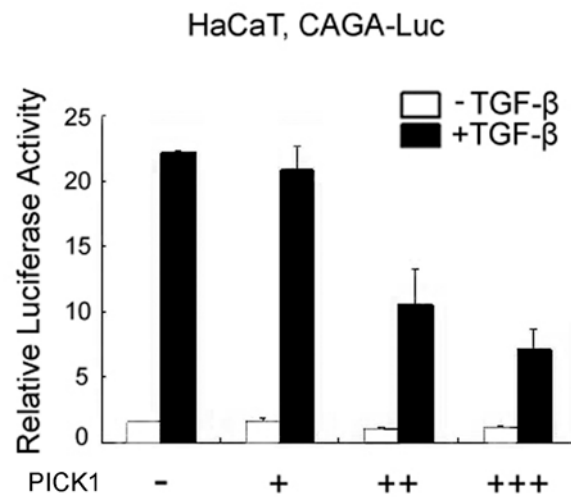

**Figure S2** Overexpression of PICK1 inhibits the TGF- $\beta$ -induced expression of CAGA-luciferase in HaCaT cells. Cells transfected with different amounts of PICK1 plasmid were treated with 100 pM TGF- $\beta$ 1 for 16 hours before harvested for luciferase assay.
