# Supplementary material
Source: PubMed Central journal article supplement (PMC3463259)
Supplement: cr201292x3.pdf [file cr201292x3.pdf]

## Supplementary information, Figure S3

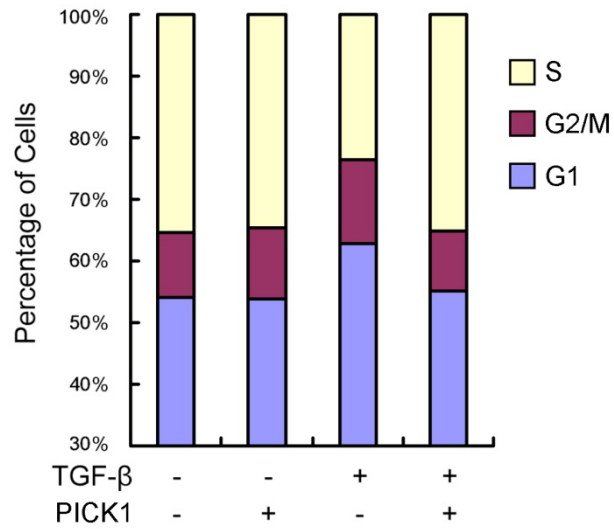

**Figure S3** PICK1 attenuates TGF- $\beta$ -induced cell cycle arrest in NMuMG cells. Cells were infected with GFP or PICK1 adenovirus and treated with TGF- $\beta$ 1 for 20 hours, followed by FACS analysis.
