# Supplementary material
Source: PubMed Central journal article supplement (PMC3463259)
Supplement: cr201292x4.pdf [file cr201292x4.pdf]

## Supplementary information, Figure S4

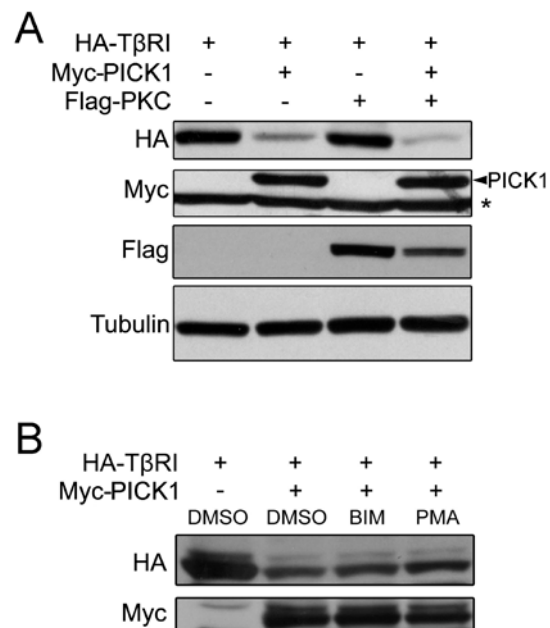

**Figure S4** PICK1-mediated degradation of T $\beta$ RI was not apparently influenced by PKC. **(A)** HEK293T cells were transfected with indicated constructs and harvested for immunoblotting. \* indicates a nonspecific band. **(B)** Both PKC inhibitor Bisindolylmaleimide I (BIM) and activator phorbol-12-myristate-13-acetate (PMA) had no effect on PICK1-mediated degradation of T $\beta$ RI. HEK293T cells transfected with indicated constructs were treated with the chemicals for 4 hours and then harvested for immunoblotting.
