# Supplementary material
Source: PubMed Central journal article supplement (PMC3463259)
Supplement: cr201292x5.pdf [file cr201292x5.pdf]

Supplementary information, Figure S5

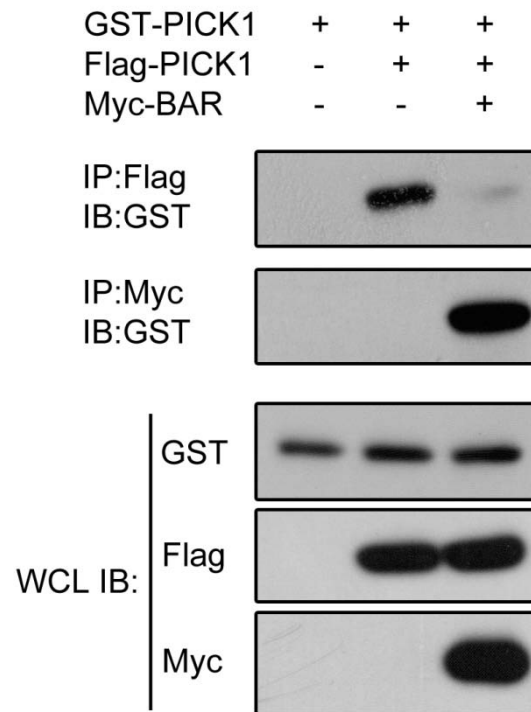

**Figure S5** Co-expression of Myc-BAR domain disrupted dimerization between GST-PICK1 and Flag-PICK1. HEK293T cells transfected with indicated constructs were harvested for immunoprecipitation and immunoblotting.
