# Supplementary material
Source: PubMed Central journal article supplement (PMC3463259)
Supplement: cr201292x6.pdf [file cr201292x6.pdf]

Supplementary information, Figure S6

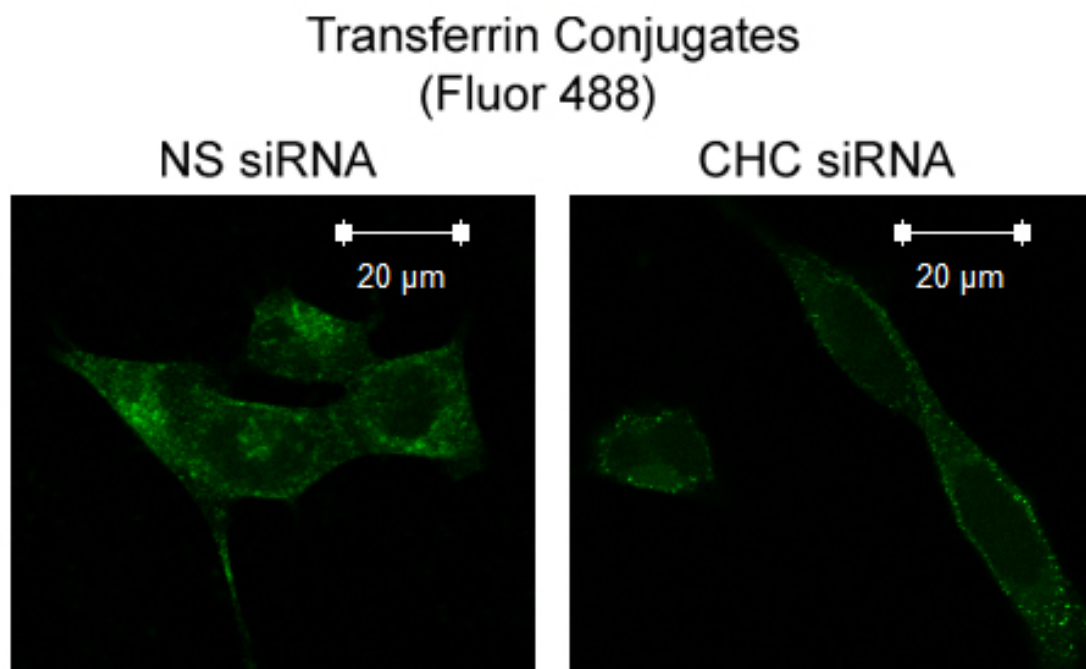

**Figure S6** Depletion of clathrin heavy chain with siRNA effectively blocks clathrin-mediated endocytosis. HEK293 cells transfected with nonspecific or CHC siRNA were labeled by transferrin conjugated with Fluor 488 at 4 °C for 30 min and followed by incubation at 37 °C for 10 min. Images were visualized with confocal microscopy.
