# Supplementary material
Source: PubMed Central journal article supplement (PMC3463259)
Supplement: cr201292x7.pdf [file cr201292x7.pdf]

## Supplementary information, Figure S7

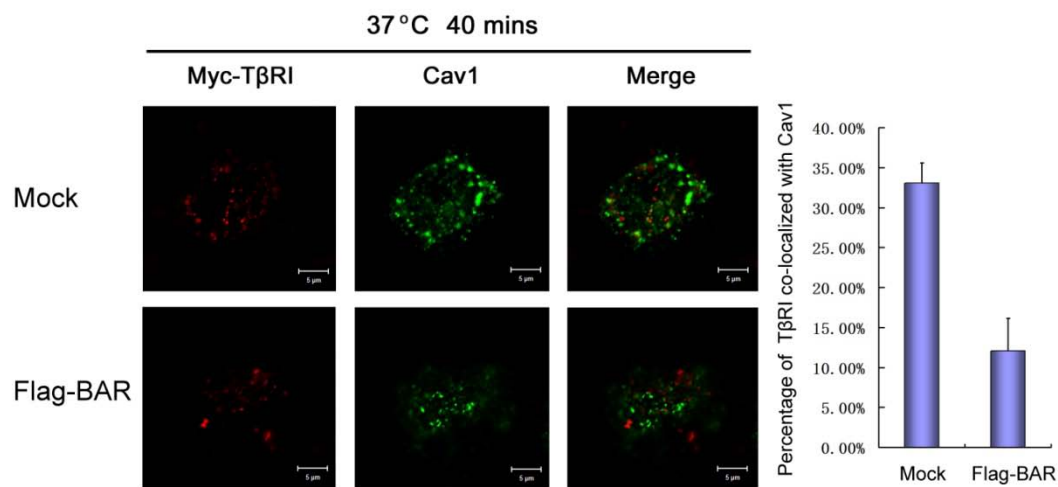

**Figure S7** Disruption of PICK1 dimerization by the BAR domain markedly decrease the co-localization between endocytic T $\beta$ RI and caveolin-1. HeLa cells transfected with Myc-T $\beta$ RI and Flag-BAR were labeled with anti-Myc antibody at 4 °C for 6 hours. Then the cells were washed with cold PBS twice, followed by incubation at 37 °C for 40 minutes. After fixation and permeabilization, the cells were visualized by immunofluorescence with anti-Myc (red) and anti-caveolin-1 (green). The percentage of T $\beta$ RI co-localized with caveolin-1 was quantitated (right panel).
